# Supplementary material
Source: PubMed Central journal article supplement (PMC1525052)

SUPPLEMENTAL MATERIAL: **Best Fit Force Constants**

Diagonal terms

Stretch

|    |     |     |      |
|----|-----|-----|------|
| 1  | Fe  | NP1 | 1.17 |
| 2  | Fe  | NP2 | 1.12 |
| 3  | Fe  | NP3 | 1.17 |
| 4  | Fe  | NP4 | 1.12 |
| 5  | AC1 | NP1 | 5.4  |
| 6  | AC2 | NP1 | 5.4  |
| 7  | AC3 | NP2 | 5.4  |
| 8  | AC4 | NP2 | 5.4  |
| 9  | AC5 | NP3 | 5.4  |
| 10 | AC6 | NP3 | 5.4  |
| 11 | AC7 | NP4 | 5.4  |
| 12 | AC8 | NP4 | 5.4  |
| 13 | AC1 | BC1 | 4.4  |
| 14 | AC1 | MC4 | 4.3  |
| 15 | AC2 | BC2 | 4.4  |
| 16 | AC2 | MC1 | 4.3  |
| 17 | AC3 | BC3 | 4.7  |
| 18 | AC3 | MC1 | 4.7  |
| 19 | AC4 | BC4 | 4.7  |
| 20 | AC4 | MC2 | 4.7  |
| 21 | AC5 | BC5 | 4.4  |
| 22 | AC5 | MC2 | 4.3  |
| 23 | AC6 | BC6 | 4.4  |
| 24 | AC6 | MC3 | 4.3  |
| 25 | AC7 | BC7 | 4.1  |
| 26 | AC7 | MC3 | 4.1  |
| 27 | AC8 | BC8 | 4.1  |
| 28 | AC8 | MC4 | 4.1  |
| 29 | BC1 | BC2 | 4.1  |
| 30 | BC1 | xC1 | 7.8  |
| 31 | BC2 | xC2 | 7.8  |
| 32 | BC3 | BC4 | 4.1  |
| 33 | BC3 | xC3 | 9.4  |
| 34 | BC4 | xC4 | 9.4  |
| 35 | BC5 | BC6 | 4.1  |
| 36 | BC5 | xC5 | 7.8  |
| 37 | BC6 | xC6 | 7.8  |
| 38 | BC7 | BC8 | 4.1  |
| 39 | BC7 | xC7 | 9.4  |
| 40 | BC8 | xC8 | 9.4  |

|    |     |     |     |
|----|-----|-----|-----|
| 41 | xC1 | yC1 | 4.1 |
| 42 | xC2 | yC2 | 4.1 |
| 43 | xC3 | yC3 | 4.1 |
| 44 | xC4 | yC4 | 4.1 |
| 45 | xC5 | yC5 | 5.1 |
| 46 | xC6 | yC6 | 5.1 |
| 47 | xC7 | yC7 | 5.1 |
| 48 | xC8 | yC8 | 5.1 |

Bend

|    |     |     |     |      |
|----|-----|-----|-----|------|
| 49 | AC1 | NP1 | Fe  | 0.17 |
| 50 | AC2 | NP1 | Fe  | 0.17 |
| 51 | AC3 | NP2 | Fe  | 0.04 |
| 52 | AC4 | NP2 | Fe  | 0.04 |
| 53 | AC5 | NP3 | Fe  | 0.17 |
| 54 | AC6 | NP3 | Fe  | 0.17 |
| 55 | AC7 | NP4 | Fe  | 0.04 |
| 56 | AC8 | NP4 | Fe  | 0.04 |
| 57 | NP1 | Fe  | NP2 | 0.12 |
| 58 | NP1 | Fe  | NP3 | 0.06 |
| 59 | NP1 | Fe  | NP4 | 0.12 |
| 60 | BC1 | AC1 | NP1 | 0.04 |
| 61 | MC4 | AC1 | NP1 | 0.28 |
| 62 | BC2 | AC2 | NP1 | 0.04 |
| 63 | MC1 | AC2 | NP1 | 0.28 |
| 64 | NP2 | Fe  | NP3 | 0.12 |
| 65 | NP2 | Fe  | NP4 | 0.06 |
| 66 | BC3 | AC3 | NP2 | 0.04 |
| 67 | MC1 | AC3 | NP2 | 0.34 |
| 68 | BC4 | AC4 | NP2 | 0.04 |
| 69 | MC2 | AC4 | NP2 | 0.34 |
| 70 | NP3 | Fe  | NP4 | 0.12 |
| 71 | BC5 | AC5 | NP3 | 0.04 |
| 72 | MC2 | AC5 | NP3 | 0.28 |
| 73 | BC6 | AC6 | NP3 | 0.04 |
| 74 | MC3 | AC6 | NP3 | 0.28 |
| 75 | BC7 | AC7 | NP4 | 0.04 |
| 76 | MC3 | AC7 | NP4 | 0.34 |
| 77 | BC8 | AC8 | NP4 | 0.04 |
| 78 | MC4 | AC8 | NP4 | 0.34 |
| 79 | AC1 | NP1 | AC2 | 0.99 |
| 80 | AC1 | BC1 | BC2 | 0.43 |
| 81 | AC1 | BC1 | xC1 | 0.17 |
| 82 | AC1 | MC4 | AC8 | 0.06 |
| 83 | AC2 | BC2 | BC1 | 0.43 |
| 84 | AC2 | BC2 | xC2 | 0.17 |
| 85 | AC2 | MC1 | AC3 | 0.06 |
| 86 | AC3 | NP2 | AC4 | 0.99 |

|     |     |     |     |      |
|-----|-----|-----|-----|------|
| 87  | AC3 | BC3 | BC4 | 0.43 |
| 88  | AC3 | BC3 | xC3 | 0.17 |
| 89  | AC4 | BC4 | BC3 | 0.43 |
| 90  | AC4 | BC4 | xC4 | 0.17 |
| 91  | AC4 | MC2 | AC5 | 0.06 |
| 92  | AC5 | NP3 | AC6 | 0.99 |
| 93  | AC5 | BC5 | BC6 | 0.43 |
| 94  | AC5 | BC5 | xC5 | 0.17 |
| 95  | AC6 | BC6 | BC5 | 0.43 |
| 96  | AC6 | BC6 | xC6 | 0.17 |
| 97  | AC6 | MC3 | AC7 | 0.06 |
| 98  | AC7 | NP4 | AC8 | 0.99 |
| 99  | AC7 | BC7 | BC8 | 0.43 |
| 100 | AC7 | BC7 | xC7 | 0.17 |
| 101 | AC8 | BC8 | BC7 | 0.43 |
| 102 | AC8 | BC8 | xC8 | 0.17 |
| 103 | BC1 | AC1 | MC4 | 0.17 |
| 104 | BC1 | BC2 | xC2 | 0.05 |
| 105 | BC1 | xC1 | yC1 | 0.11 |
| 106 | BC2 | AC2 | MC1 | 0.17 |
| 107 | BC2 | BC1 | xC1 | 0.05 |
| 108 | BC2 | xC2 | yC2 | 0.11 |
| 109 | BC3 | AC3 | MC1 | 0.17 |
| 110 | BC3 | BC4 | xC4 | 0.05 |
| 111 | BC3 | xC3 | yC3 | 0.11 |
| 112 | BC4 | AC4 | MC2 | 0.17 |
| 113 | BC4 | BC3 | xC3 | 0.05 |
| 114 | BC4 | xC4 | yC4 | 0.11 |
| 115 | BC5 | AC5 | MC2 | 0.17 |
| 116 | BC5 | BC6 | xC6 | 0.05 |
| 117 | BC5 | xC5 | yC5 | 0.11 |
| 118 | BC6 | AC6 | MC3 | 0.17 |
| 119 | BC6 | BC5 | xC5 | 0.05 |
| 120 | BC6 | xC6 | yC6 | 0.11 |
| 121 | BC7 | AC7 | MC3 | 0.17 |
| 122 | BC7 | BC8 | xC8 | 0.05 |
| 123 | BC7 | xC7 | yC7 | 0.11 |
| 124 | BC8 | AC8 | MC4 | 0.17 |
| 125 | BC8 | BC7 | xC7 | 0.05 |
| 126 | BC8 | xC8 | yC8 | 0.11 |

| Torsion |     |     |     |     |       |
|---------|-----|-----|-----|-----|-------|
| 127     | BC1 | AC1 | NP1 | Fe  | 0.012 |
| 128     | Fe  | NP1 | AC1 | MC4 | 0.006 |
| 129     | BC2 | AC2 | NP1 | Fe  | 0.012 |
| 130     | Fe  | NP1 | AC2 | MC1 | 0.006 |
| 131     | BC3 | AC3 | NP2 | Fe  | 0.012 |
| 132     | Fe  | NP2 | AC3 | MC1 | 0.006 |

|     |     |     |     |     |       |
|-----|-----|-----|-----|-----|-------|
| 133 | BC4 | AC4 | NP2 | Fe  | 0.012 |
| 134 | Fe  | NP2 | AC4 | MC2 | 0.006 |
| 135 | BC5 | AC5 | NP3 | Fe  | 0.012 |
| 136 | Fe  | NP3 | AC5 | MC2 | 0.006 |
| 137 | BC6 | AC6 | NP3 | Fe  | 0.012 |
| 138 | Fe  | NP3 | AC6 | MC3 | 0.006 |
| 139 | BC7 | AC7 | NP4 | Fe  | 0.012 |
| 140 | Fe  | NP4 | AC7 | MC3 | 0.006 |
| 141 | BC8 | AC8 | NP4 | Fe  | 0.012 |
| 142 | Fe  | NP4 | AC8 | MC4 | 0.006 |
| 143 | AC3 | NP2 | Fe  | NP1 | 0.01  |
| 144 | AC4 | NP2 | Fe  | NP1 | 0.01  |
| 145 | AC5 | NP3 | Fe  | NP1 | 0.02  |
| 146 | AC6 | NP3 | Fe  | NP1 | 0.02  |
| 147 | AC7 | NP4 | Fe  | NP1 | 0.01  |
| 148 | AC8 | NP4 | Fe  | NP1 | 0.01  |
| 149 | BC2 | BC1 | AC1 | NP1 | 0.015 |
| 150 | NP1 | AC1 | BC1 | xC1 | 0.015 |
| 151 | AC8 | MC4 | AC1 | NP1 | 0.03  |
| 152 | BC1 | BC2 | AC2 | NP1 | 0.015 |
| 153 | NP1 | AC2 | BC2 | xC2 | 0.015 |
| 154 | AC3 | MC1 | AC2 | NP1 | 0.03  |
| 155 | AC1 | NP1 | Fe  | NP2 | 0.01  |
| 156 | AC2 | NP1 | Fe  | NP2 | 0.01  |
| 157 | AC5 | NP3 | Fe  | NP2 | 0.01  |
| 158 | AC6 | NP3 | Fe  | NP2 | 0.01  |
| 159 | AC7 | NP4 | Fe  | NP2 | 0.02  |
| 160 | AC8 | NP4 | Fe  | NP2 | 0.02  |
| 161 | BC4 | BC3 | AC3 | NP2 | 0.015 |
| 162 | NP2 | AC3 | BC3 | xC3 | 0.015 |
| 163 | AC2 | MC1 | AC3 | NP2 | 0.03  |
| 164 | BC3 | BC4 | AC4 | NP2 | 0.015 |
| 165 | NP2 | AC4 | BC4 | xC4 | 0.015 |
| 166 | AC5 | MC2 | AC4 | NP2 | 0.03  |
| 167 | AC1 | NP1 | Fe  | NP3 | 0.02  |
| 168 | AC2 | NP1 | Fe  | NP3 | 0.02  |
| 169 | AC3 | NP2 | Fe  | NP3 | 0.01  |
| 170 | AC4 | NP2 | Fe  | NP3 | 0.01  |
| 171 | AC7 | NP4 | Fe  | NP3 | 0.01  |
| 172 | AC8 | NP4 | Fe  | NP3 | 0.01  |
| 173 | BC6 | BC5 | AC5 | NP3 | 0.015 |
| 174 | NP3 | AC5 | BC5 | xC5 | 0.015 |
| 175 | AC4 | MC2 | AC5 | NP3 | 0.03  |
| 176 | BC5 | BC6 | AC6 | NP3 | 0.015 |
| 177 | NP3 | AC6 | BC6 | xC6 | 0.015 |
| 178 | AC7 | MC3 | AC6 | NP3 | 0.03  |
| 179 | AC1 | NP1 | Fe  | NP4 | 0.01  |
| 180 | AC2 | NP1 | Fe  | NP4 | 0.01  |

|     |     |     |     |     |       |
|-----|-----|-----|-----|-----|-------|
| 181 | AC3 | NP2 | Fe  | NP4 | 0.02  |
| 182 | AC4 | NP2 | Fe  | NP4 | 0.02  |
| 183 | AC5 | NP3 | Fe  | NP4 | 0.01  |
| 184 | AC6 | NP3 | Fe  | NP4 | 0.01  |
| 185 | BC8 | BC7 | AC7 | NP4 | 0.015 |
| 186 | NP4 | AC7 | BC7 | xC7 | 0.015 |
| 187 | AC6 | MC3 | AC7 | NP4 | 0.03  |
| 188 | BC7 | BC8 | AC8 | NP4 | 0.015 |
| 189 | NP4 | AC8 | BC8 | xC8 | 0.015 |
| 190 | AC1 | MC4 | AC8 | NP4 | 0.03  |
| 191 | AC1 | NP1 | AC2 | BC2 | 0.02  |
| 192 | AC1 | NP1 | AC2 | MC1 | 0.002 |
| 193 | AC2 | BC2 | BC1 | AC1 | 0.016 |
| 194 | AC1 | BC1 | BC2 | xC2 | 0.003 |
| 195 | AC1 | BC1 | xC1 | yC1 | 0.002 |
| 196 | AC1 | MC4 | AC8 | BC8 | 0.015 |
| 197 | AC2 | NP1 | AC1 | BC1 | 0.02  |
| 198 | AC2 | NP1 | AC1 | MC4 | 0.002 |
| 199 | AC2 | BC2 | BC1 | xC1 | 0.003 |
| 200 | AC2 | BC2 | xC2 | yC2 | 0.002 |
| 201 | AC2 | MC1 | AC3 | BC3 | 0.015 |
| 202 | AC3 | NP2 | AC4 | BC4 | 0.02  |
| 203 | AC3 | NP2 | AC4 | MC2 | 0.002 |
| 204 | AC4 | BC4 | BC3 | AC3 | 0.016 |
| 205 | AC3 | BC3 | BC4 | xC4 | 0.003 |
| 206 | AC3 | BC3 | xC3 | yC3 | 0.002 |
| 207 | AC3 | MC1 | AC2 | BC2 | 0.015 |
| 208 | AC4 | NP2 | AC3 | BC3 | 0.02  |
| 209 | AC4 | NP2 | AC3 | MC1 | 0.002 |
| 210 | AC4 | BC4 | BC3 | xC3 | 0.003 |
| 211 | AC4 | BC4 | xC4 | yC4 | 0.002 |
| 212 | AC4 | MC2 | AC5 | BC5 | 0.015 |
| 213 | AC5 | NP3 | AC6 | BC6 | 0.02  |
| 214 | AC5 | NP3 | AC6 | MC3 | 0.002 |
| 215 | AC6 | BC6 | BC5 | AC5 | 0.016 |
| 216 | AC5 | BC5 | BC6 | xC6 | 0.003 |
| 217 | AC5 | BC5 | xC5 | yC5 | 0.002 |
| 218 | AC5 | MC2 | AC4 | BC4 | 0.015 |
| 219 | AC6 | NP3 | AC5 | BC5 | 0.02  |
| 220 | AC6 | NP3 | AC5 | MC2 | 0.002 |
| 221 | AC6 | BC6 | BC5 | xC5 | 0.003 |
| 222 | AC6 | BC6 | xC6 | yC6 | 0.002 |
| 223 | AC6 | MC3 | AC7 | BC7 | 0.015 |
| 224 | AC7 | NP4 | AC8 | BC8 | 0.02  |
| 225 | AC7 | NP4 | AC8 | MC4 | 0.002 |
| 226 | AC8 | BC8 | BC7 | AC7 | 0.016 |
| 227 | AC7 | BC7 | BC8 | xC8 | 0.003 |
| 228 | AC7 | BC7 | xC7 | yC7 | 0.002 |

|     |     |     |     |     |       |
|-----|-----|-----|-----|-----|-------|
| 229 | AC7 | MC3 | AC6 | BC6 | 0.015 |
| 230 | AC8 | NP4 | AC7 | BC7 | 0.02  |
| 231 | AC8 | NP4 | AC7 | MC3 | 0.002 |
| 232 | AC8 | BC8 | BC7 | xC7 | 0.003 |
| 233 | AC8 | BC8 | xC8 | yC8 | 0.002 |
| 234 | AC8 | MC4 | AC1 | BC1 | 0.015 |
| 235 | BC1 | BC2 | AC2 | MC1 | 0.003 |
| 236 | BC1 | BC2 | xC2 | yC2 | 0.021 |
| 237 | BC2 | BC1 | AC1 | MC4 | 0.003 |
| 238 | BC2 | BC1 | xC1 | yC1 | 0.021 |
| 239 | BC3 | BC4 | AC4 | MC2 | 0.003 |
| 240 | BC3 | BC4 | xC4 | yC4 | 0.021 |
| 241 | BC4 | BC3 | AC3 | MC1 | 0.003 |
| 242 | BC4 | BC3 | xC3 | yC3 | 0.021 |
| 243 | BC5 | BC6 | AC6 | MC3 | 0.003 |
| 244 | BC5 | BC6 | xC6 | yC6 | 0.021 |
| 245 | BC6 | BC5 | AC5 | MC2 | 0.003 |
| 246 | BC6 | BC5 | xC5 | yC5 | 0.021 |
| 247 | BC7 | BC8 | AC8 | MC4 | 0.003 |
| 248 | BC7 | BC8 | xC8 | yC8 | 0.021 |
| 249 | BC8 | BC7 | AC7 | MC3 | 0.003 |
| 250 | BC8 | BC7 | xC7 | yC7 | 0.021 |
| 251 | MC1 | AC2 | BC2 | xC2 | 0.003 |
| 252 | MC1 | AC3 | BC3 | xC3 | 0.003 |
| 253 | MC2 | AC4 | BC4 | xC4 | 0.003 |
| 254 | MC2 | AC5 | BC5 | xC5 | 0.003 |
| 255 | MC3 | AC6 | BC6 | xC6 | 0.003 |
| 256 | MC3 | AC7 | BC7 | xC7 | 0.003 |
| 257 | MC4 | AC1 | BC1 | xC1 | 0.003 |
| 258 | MC4 | AC8 | BC8 | xC8 | 0.003 |
| 259 | xC2 | BC2 | BC1 | xC1 | 0.072 |
| 260 | xC4 | BC4 | BC3 | xC3 | 0.072 |
| 261 | xC6 | BC6 | BC5 | xC5 | 0.072 |
| 262 | xC8 | BC8 | BC7 | xC7 | 0.072 |

Out-of-plane  
263-323 All 1.19

#### Off-diagonal terms

{Explanation: The first column represents the set of the force constants (1 means first force constant from the table, 2 - second and so on), the second column gives the off-diagonal term value.

For example:

"1,2,3,4" 0.1

means that there is off-diagonal coupling between the force constants:

1 and 2  
1 and 3  
1 and 4  
2 and 3  
2 and 4  
3 and 4

and for all of them the off-diagonal coupling constant equals 0.1.}

|                                   |       |  |
|-----------------------------------|-------|--|
| "1,3,79,92"                       | 0.04  |  |
| "2,4,86,98"                       | 0.05  |  |
| 5-48                              | -2.6  |  |
| "67,69,76,78"                     | 0.06  |  |
| "80,83,87,89,93,95,99,101"        | 0.03  |  |
| "81,94"                           | -0.05 |  |
| "84,96"                           | -0.05 |  |
| "88,100"                          | -0.04 |  |
| "90,102"                          | -0.04 |  |
| "82,85,91,97"                     | 0.02  |  |
| "127,129,131,133,135,137,139,141" | -0.03 |  |
| "267,268"                         | 0.2   |  |
| "272,273"                         | -0.6  |  |

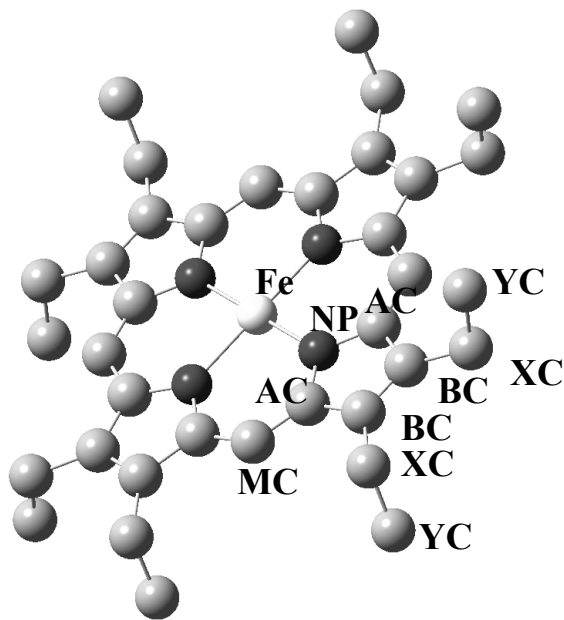

Supplement: NIHMS11332-supplement-supp.pdf [file NIHMS11332-supplement-supp.pdf]
